# Supplementary material
Source: PubMed Central journal article supplement (PMC2597226)
Supplement: NIHMS74435-supplement-01.pdf [file NIHMS74435-supplement-01.pdf]

Supplementary Information – Evans *et al.*, “Co-translational folding promotes...”

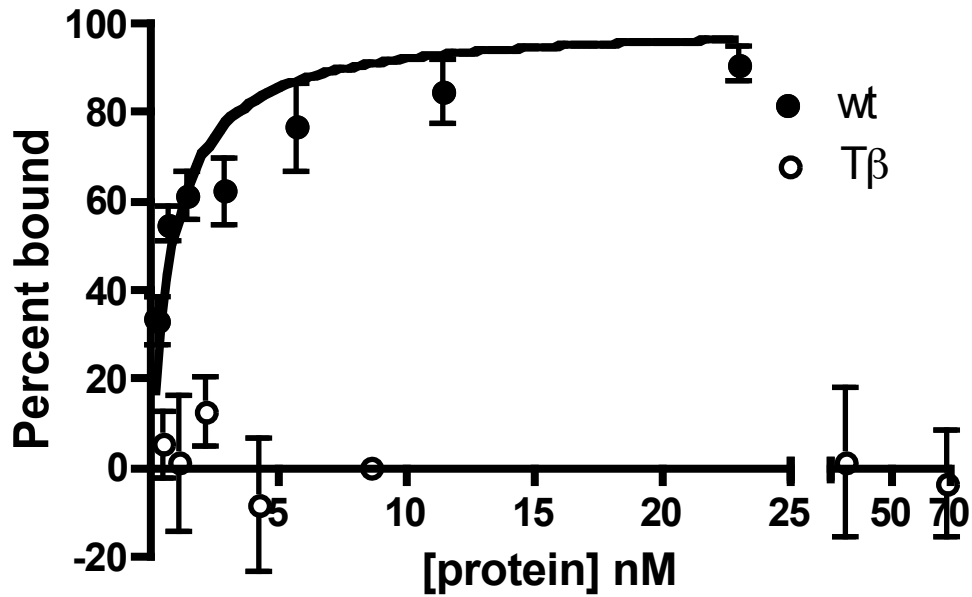

**Supplementary Figure S1:** *Representative tailspike competition ELISA data.*

Measurements of binding of mAb 155 to native wild type tailspike trimer and Tβ. mAb 155 binds to tailspike with an apparent  $K_d$  of 0.845 nM, but has no apparent binding affinity for Tβ.

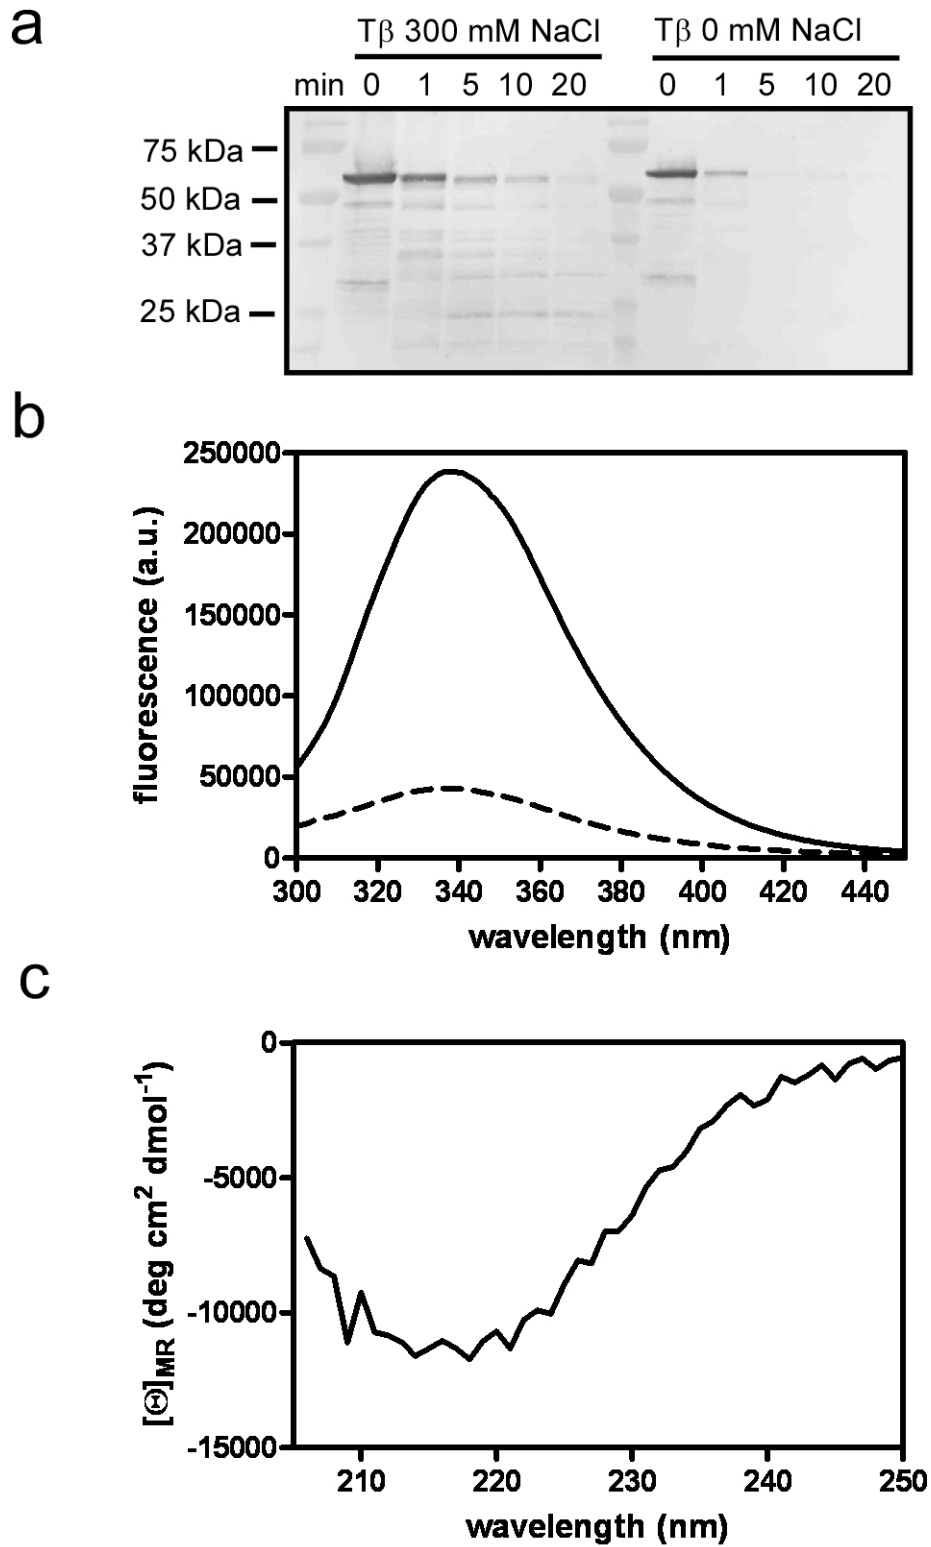

**Supplementary Figure S2:** *T $\beta$  refolded under low salt conditions has native-like spectral signatures, but no protease-resistant fragment.* (a) Western blot of proteinase K

digestion of T $\beta$  refolded in refolding buffer (300 mM NaCl, 50 mM phosphate, 2 mM EDTA, 3  $\mu$ M 2-mercaptoethanol, pH 8.0)), or 50 mM phosphate, pH 7.0. Proteinase K was added at a final concentration of 1  $\mu$ g/ml and digestions were performed for the indicated times at 4°C. **(b)** Fluorescence emission spectra for T $\beta$  refolded under low-salt conditions (dashed line), and native tailspike (solid line). **(c)** Far-UV circular dichroism spectrum of T $\beta$  refolded under low-salt conditions.

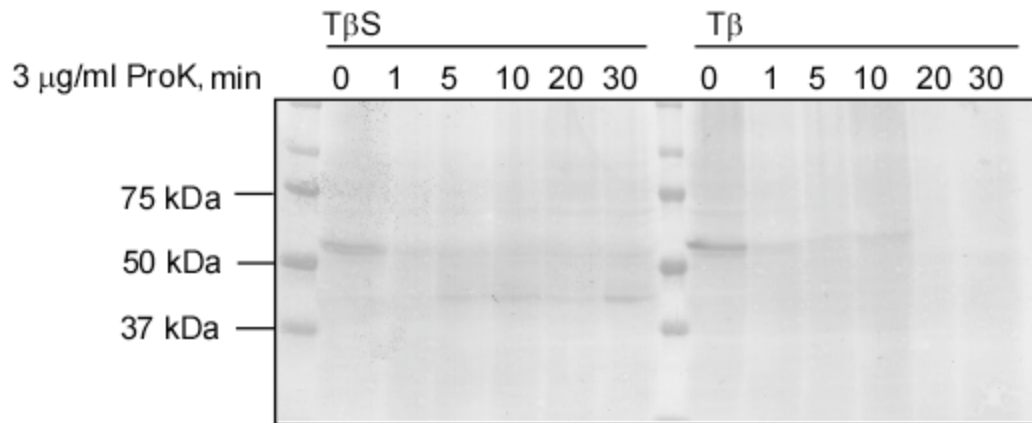

**Supplementary Figure S3:** *Proteolysis of Tβ refolded in an E. coli cell lysate supernatant.* Similar concentrations of Tβ refolded in the presence of a cleared lysate and TβS were subjected to proteinase K digestion for the indicated times at a final proteinase K concentration of 3 μg/ml. Cleared lysate was added to the TβS sample mixture prior to digestion in order to normalize digestion conditions.

## Supplementary Methods

### *Refolding of T $\beta$ in Lysate*

Concentrated T $\beta$  in 6M GdnHCl was refolded by rapid 1:50 dilution and rapid mixing with a micropipette into an *E. coli* cell lysate supernatant. The refolding solution was incubated at 0°C for at least 48 hours prior to use.

### *Protease Digestions of T $\beta$ Under Alternative Conditions*

Purified T $\beta$  refolded under either physiological or low salt conditions was digested with 1  $\mu$ M proteinase K for the indicated times, following the protocol described (Methods). For the digestion of T $\beta$ S and T $\beta$  refolded in lysate, a concentration of 3  $\mu$ g/ml proteinase K was used, and *E. coli* lysate supernatant was added to the purified ribosome sample. Digestion products were detected as described (Fig. 3a).

### *Fluorescence Measurements*

All fluorescence measurements were made using a PTI QM-6 fluorimeter (Birmingham, NJ). Each protein concentration was 10  $\mu$ g/ml. Samples were measured at 10°C in 50 mM phosphate buffer, with an excitation wavelength of 280 nm, and integration time of 1 sec. Spectra shown are an average of three scans.

### *Circular Dichroism Spectroscopy*

All CD spectra were collected using an Aviv 62DS CD Spectrometer (Lakewood, NJ). All measurements were made at 10°C, in 50 mM phosphate buffer, with a protein

concentration of 0.4 mg/ml. A step size of 1 nm and an averaging time of 5 sec were used.
